# Supplementary material
Source: MDPI journal article supplement (https://www.mdpi.com/2077-0472/11/1/44)
Supplement: s1 [file s1]

**Table S1.** Variation in gravimetric water content affected by selected organic amendments at different incubation periods.

| Organic Amendment | Gravimetric Water Content<br>(g g <sup>-1</sup> ) |                 |                 |                 |
|-------------------|---------------------------------------------------|-----------------|-----------------|-----------------|
|                   | 15 Days                                           | 30 Days         | 45 Days         | 60 Days         |
| RHB               | 0.35 ± 0.02 ABb                                   | 0.36 ± 0.02 Ab  | 0.44 ± 0.01 Aa  | 0.46 ± 0.01 Aa  |
| EFBB              | 0.37 ± 0.01 Ab                                    | 0.38 ± 0.01 Ab  | 0.37 ± 0.02 Ab  | 0.45 ± 0.02 Aa  |
| COMP              | 0.36 ± 0.02 Aa                                    | 0.37 ± 0.02 Aa  | 0.40 ± 0.01 Aa  | 0.40 ± 0.01 ABa |
| RHA               | 0.37 ± 0.01 Aa                                    | 0.20 ± 0.01 Bb  | 0.30 ± 0.02 Ba  | 0.34 ± 0.02 BCa |
| PBA               | 0.30 ± 0.02 BCa                                   | 0.24 ± 0.04 Ba  | 0.29 ± 0.03 Ba  | 0.29 ± 0.03 Ca  |
| Control           | 0.29 ± 0.01 Ca                                    | 0.23 ± 0.05 Bab | 0.21 ± 0.02 Cbc | 0.17 ± 0.02 Dc  |

Values are presented as mean ± standard error with different uppercase letters in the same column and lowercase letters in the same row indicating significant difference ( $p < 0.05$ ) among the organic amendments and incubation days, respectively. RHB, Rice husk biochar; EFBB, Oil palm empty fruit bunch biochar; COMP, Compost; RHA, Rice husk ash; PBA, Oil palm bunch ash, and control, no amendment.
